# Supplementary material for: Future shift of the relative roles of precipitation and temperature in controlling annual runoff in the conterminous United States
Source: Copernicus journal article supplement (doi:10.5194/hess-2016-493), 2016-10-05
Supplement: Supplementary file 1 [file hess-2016-493-supplement.pdf]

**Future shift of the relative roles of precipitation and temperature in  
controlling annual runoff in the conterminous United States**

Kai Duan<sup>1</sup>, Ge Sun<sup>2\*</sup>, Steven G. McNulty<sup>2</sup>, Peter V. Caldwell<sup>3</sup>, Erika C. Cohen<sup>2</sup>,  
Shanlei Sun<sup>4</sup>, Heather D. Aldridge<sup>5</sup>, Decheng Zhou<sup>4</sup>, Liangxia Zhang<sup>4</sup>, Yang Zhang<sup>1</sup>

<sup>1</sup> Department of Marine, Earth, and Atmospheric Sciences, North Carolina State University, Raleigh, NC, USA

<sup>2</sup> Eastern Forest Environmental Threat Assessment Center, USDA Forest Service, Raleigh, NC, USA

<sup>3</sup> Coweeta Hydrologic Laboratory, USDA Forest Service, Otto, NC, USA

<sup>4</sup> Key Laboratory of Meteorological Disaster of Ministry of Education, Nanjing University of Information Science & Technology, Nanjing, Jiangsu, China

<sup>5</sup> State Climate Office of North Carolina, North Carolina State University, Raleigh, NC, USA

**Contents of this file**

1. Supplementary Table S1~S6;

## Supplementary Tables

**Table S1.** Comparison of percent changes (%) in mean annual precipitation ( $\text{mm yr}^{-1}$ ) during historical period (from 1961-1985 to 1986-2010) and in the future scenarios (from Baseline scenario to S1~S4 scenarios) in 18 WRRs and CONUS.

| WRR   | Historical change |           | Future change |    |    |    |     |
|-------|-------------------|-----------|---------------|----|----|----|-----|
|       | 1961-1985         | 1986-2010 | Baseline      | S1 | S2 | S3 | S4  |
| 1     | 1109              | +6        | 1148          | +6 | +9 | +7 | +12 |
| 2     | 1066              | +4        | 1102          | +5 | +7 | +5 | +10 |
| 3     | 1337              | -2        | 1324          | +2 | +4 | +3 | +1  |
| 4     | 852               | +3        | 862           | +5 | +7 | +6 | +10 |
| 5     | 1118              | +2        | 1143          | +3 | +5 | +4 | +7  |
| 6     | 1388              | -2        | 1400          | +2 | +4 | +3 | +4  |
| 7     | 853               | +2        | 856           | +4 | +5 | +4 | +7  |
| 8     | 1404              | +1        | 1408          | +0 | +1 | +0 | -3  |
| 9     | 534               | +5        | 544           | +5 | +6 | +5 | +8  |
| 10    | 526               | +3        | 537           | +3 | +5 | +4 | +7  |
| 11    | 762               | +8        | 795           | +1 | +1 | +1 | -1  |
| 12    | 794               | +4        | 809           | -2 | -1 | -2 | -7  |
| 13    | 357               | +5        | 367           | -0 | +1 | -1 | -4  |
| 14    | 373               | +1        | 392           | +3 | +7 | +4 | +7  |
| 15    | 325               | -5        | 321           | +0 | +4 | +2 | +1  |
| 16    | 318               | -4        | 313           | +2 | +6 | +4 | +11 |
| 17    | 854               | -4        | 862           | +3 | +5 | +3 | +8  |
| 18    | 610               | -4        | 589           | +0 | +2 | +2 | +5  |
| CONUS | 777               | +1        | 786           | +2 | +4 | +3 | +4  |

**Table S2.** Comparison of changes ( °C) in mean temperature during historical period (from 1961-1985 to 1986-2010) and in the future scenarios (from Baseline scenario to S1~S4 scenarios) in 18 WRRs and CONUS.

| WRR   | Historical change |           | Future change |      |      |      |      |
|-------|-------------------|-----------|---------------|------|------|------|------|
|       | 1961-1985         | 1986-2010 | Baseline      | S1   | S2   | S3   | S4   |
| 1     | 5.9               | +0.5      | 6             | +1.9 | +3.2 | +2.1 | +5.6 |
| 2     | 9.9               | +0.6      | 10            | +1.8 | +3.0 | +2.0 | +5.2 |
| 3     | 17.7              | +0.3      | 18            | +1.5 | +2.4 | +1.6 | +4.3 |
| 4     | 6.9               | +0.5      | 7             | +2.0 | +3.3 | +2.2 | +5.8 |
| 5     | 11.3              | +0.5      | 12            | +1.8 | +2.9 | +2.0 | +5.1 |
| 6     | 13.5              | +0.5      | 14            | +1.6 | +2.6 | +1.8 | +4.7 |
| 7     | 8.1               | +0.5      | 9             | +2.0 | +3.4 | +2.2 | +5.8 |
| 8     | 17.3              | +0.3      | 18            | +1.6 | +2.6 | +1.8 | +4.7 |
| 9     | 3.7               | +0.7      | 4             | +2.1 | +3.6 | +2.4 | +6.2 |
| 10    | 7.5               | +0.5      | 8             | +1.9 | +3.1 | +2.1 | +5.5 |
| 11    | 13.9              | +0.2      | 14            | +1.7 | +2.8 | +2.0 | +5.1 |
| 12    | 18.7              | +0.3      | 19            | +1.6 | +2.6 | +1.8 | +4.8 |
| 13    | 13.8              | +0.5      | 14            | +1.7 | +2.9 | +1.9 | +5.1 |
| 14    | 6.9               | +0.6      | 6             | +1.9 | +3.2 | +2.1 | +5.6 |
| 15    | 14.8              | +0.7      | 15            | +1.7 | +2.9 | +1.9 | +5.1 |
| 16    | 8.5               | +0.6      | 8             | +1.9 | +3.2 | +2.1 | +5.5 |
| 17    | 6.9               | +0.6      | 6             | +1.7 | +3.0 | +2.0 | +5.2 |
| 18    | 13.6              | +0.7      | 13            | +1.4 | +2.6 | +1.7 | +4.6 |
| CONUS | 11.2              | +0.5      | 11            | +1.8 | +2.9 | +2.0 | +5.2 |

**Table S3.** Comparison of percent changes (%) in mean annual potential evapotranspiration ( $\text{mm yr}^{-1}$ ) during historical period (from 1961-1985 to 1986-2010) and in the future scenarios (from Baseline scenario to S1~S4 scenarios) in 18 WRRs and CONUS.

| WRR   | Historical change |           | Future change |     |     |     |     |
|-------|-------------------|-----------|---------------|-----|-----|-----|-----|
|       | 1961-1985         | 1986-2010 | Baseline      | S1  | S2  | S3  | S4  |
| 1     | 649               | -0        | 661           | +12 | +21 | +13 | +40 |
| 2     | 796               | -0        | 816           | +11 | +19 | +13 | +37 |
| 3     | 1164              | +0        | 1195          | +9  | +15 | +10 | +29 |
| 4     | 692               | -0        | 710           | +12 | +22 | +14 | +41 |
| 5     | 855               | -0        | 874           | +11 | +19 | +13 | +37 |
| 6     | 939               | -0        | 957           | +11 | +18 | +12 | +34 |
| 7     | 773               | -0        | 791           | +12 | +22 | +14 | +41 |
| 8     | 1161              | -0        | 1185          | +10 | +17 | +11 | +32 |
| 9     | 639               | -0        | 656           | +13 | +23 | +15 | +43 |
| 10    | 733               | -0        | 745           | +12 | +21 | +14 | +40 |
| 11    | 1002              | -0        | 1020          | +11 | +19 | +13 | +36 |
| 12    | 1244              | -0        | 1271          | +10 | +17 | +11 | +31 |
| 13    | 972               | -0        | 994           | +11 | +18 | +12 | +35 |
| 14    | 668               | -0        | 665           | +13 | +21 | +14 | +41 |
| 15    | 1040              | -0        | 1062          | +11 | +19 | +12 | +35 |
| 16    | 716               | +0        | 721           | +12 | +22 | +14 | +41 |
| 17    | 638               | +0        | 627           | +12 | +21 | +14 | +40 |
| 18    | 942               | -0        | 940           | +9  | +18 | +11 | +32 |
| CONUS | 873               | -0        | 887           | +11 | +19 | +13 | +36 |

**Table S4.** Comparison of percent changes (%) in mean annual evapotranspiration ( $\text{mm yr}^{-1}$ ) during historical period (from 1961-1985 to 1986-2010) and in the future scenarios (from Baseline scenario to S1~S4 scenarios) in 18 WRRs and CONUS.

| WRR   | Historical change |           | Future change |     |     |     |     |
|-------|-------------------|-----------|---------------|-----|-----|-----|-----|
|       | 1961-1985         | 1986-2010 | Baseline      | S1  | S2  | S3  | S4  |
| 1     | 483               | +2        | 495           | +10 | +17 | +11 | +30 |
| 2     | 587               | +2        | 607           | +8  | +13 | +9  | +22 |
| 3     | 885               | -1        | 887           | +4  | +6  | +4  | +8  |
| 4     | 463               | +1        | 474           | +10 | +17 | +11 | +30 |
| 5     | 601               | +0        | 611           | +8  | +13 | +9  | +22 |
| 6     | 808               | -1        | 810           | +5  | +8  | +6  | +13 |
| 7     | 542               | +1        | 552           | +9  | +15 | +10 | +26 |
| 8     | 880               | +0        | 882           | +3  | +6  | +4  | +7  |
| 9     | 410               | +2        | 420           | +9  | +14 | +10 | +22 |
| 10    | 408               | +2        | 415           | +7  | +12 | +9  | +18 |
| 11    | 586               | +5        | 600           | +3  | +5  | +3  | +5  |
| 12    | 618               | +2        | 617           | -0  | +1  | -0  | -3  |
| 13    | 331               | +5        | 336           | +0  | +2  | +0  | -2  |
| 14    | 274               | +1        | 274           | +7  | +13 | +8  | +19 |
| 15    | 297               | -3        | 295           | +1  | +4  | +2  | +2  |
| 16    | 267               | -3        | 258           | +5  | +11 | +7  | +18 |
| 17    | 423               | -2        | 410           | +8  | +14 | +9  | +23 |
| 18    | 352               | -2        | 343           | +2  | +5  | +4  | +8  |
| CONUS | 508               | +1        | 511           | +5  | +9  | +6  | +14 |

**Table S5.** Comparison of percent changes (%) in mean annual runoff ( $\text{mm yr}^{-1}$ ) during historical period (from 1961-1985 to 1986-2010) and in the future scenarios (from Baseline scenario to S1~S4 scenarios) in 18 WRRs and CONUS.

| WRR   | Historical change |           | Future change |     |     |     |     |
|-------|-------------------|-----------|---------------|-----|-----|-----|-----|
|       | 1961-1985         | 1986-2010 | B             | S1  | S2  | S3  | S4  |
| 1     | 627               | +8        | 654           | +3  | +2  | +3  | -1  |
| 2     | 478               | +7        | 495           | +1  | -1  | +1  | -5  |
| 3     | 450               | -4        | 437           | -1  | -1  | -1  | -12 |
| 4     | 387               | +5        | 388           | -2  | -7  | -2  | -14 |
| 5     | 516               | +4        | 532           | -2  | -5  | -2  | -10 |
| 6     | 580               | -3        | 590           | -3  | -3  | -0  | -8  |
| 7     | 308               | +5        | 305           | -7  | -14 | -7  | -26 |
| 8     | 523               | +2        | 527           | -5  | -8  | -5  | -21 |
| 9     | 122               | +16       | 124           | -10 | -21 | -10 | -37 |
| 10    | 117               | +8        | 123           | -10 | -18 | -11 | -28 |
| 11    | 177               | +19       | 197           | -7  | -11 | -7  | -22 |
| 12    | 179               | +13       | 193           | -5  | -7  | -6  | -20 |
| 13    | 31                | +10       | 35            | -6  | -8  | -8  | -24 |
| 14    | 99                | +1        | 121           | -7  | -9  | -7  | -21 |
| 15    | 29                | -11       | 29            | -8  | -6  | -4  | -10 |
| 16    | 53                | -9        | 59            | -13 | -17 | -12 | -21 |
| 17    | 431               | -6        | 455           | -2  | -4  | -3  | -6  |
| 18    | 259               | -8        | 248           | -3  | -3  | -1  | +1  |
| CONUS | 269               | +2        | 276           | -3  | -6  | -3  | -13 |

**Table S6.** Comparison of contributions (%) of precipitation ( $P$ ), temperature ( $T$ ), and interactions between  $P$  and  $T$  ( $P\&T$ ) to changes in runoff over the entire CONUS in the future scenarios S1~S4.

| Land cover       | S1  |     |        | S2  |     |        | S3  |     |        | S4  |     |        |
|------------------|-----|-----|--------|-----|-----|--------|-----|-----|--------|-----|-----|--------|
|                  | $P$ | $T$ | $P\&T$ |
| Crop             | 30  | 64  | 6      | 31  | 64  | 4      | 35  | 61  | 4      | 30  | 65  | 5      |
| Deciduous forest | 28  | 65  | 7      | 32  | 64  | 4      | 35  | 59  | 5      | 30  | 66  | 4      |
| Evergreen forest | 29  | 64  | 6      | 34  | 62  | 4      | 36  | 59  | 5      | 30  | 65  | 5      |
| Mixed forest     | 28  | 65  | 7      | 32  | 64  | 4      | 37  | 58  | 5      | 30  | 66  | 4      |
| Grassland        | 29  | 63  | 8      | 30  | 64  | 6      | 34  | 61  | 5      | 30  | 64  | 6      |
| Shrubland        | 32  | 61  | 7      | 35  | 60  | 5      | 37  | 58  | 5      | 32  | 62  | 6      |
| Wetland          | 30  | 64  | 6      | 32  | 64  | 4      | 35  | 61  | 4      | 29  | 66  | 5      |
| Open water       | 26  | 56  | 18     | 30  | 58  | 12     | 31  | 53  | 15     | 32  | 61  | 6      |
| Urban            | 35  | 59  | 6      | 37  | 59  | 4      | 40  | 55  | 5      | 33  | 63  | 4      |
| Barren           | 33  | 61  | 6      | 37  | 59  | 4      | 39  | 57  | 4      | 33  | 62  | 5      |
